# Supplementary material for: Survey of ticks and tick-borne pathogens in wild chimpanzee habitat in Western Uganda
Source: PubMed Central journal article supplement (PMC9869571; doi:10.1186/s13071-022-05632-w), 2023-01-22
Supplement: 13071_2022_5632_MOESM2_ESM.pdf [file 13071_2022_5632_MOESM2_ESM.pdf]

**Figure S1.** Dorsal and ventral pictures of remarkable tick individuals collected at Sebitoli, Kibale National Park, Uganda.

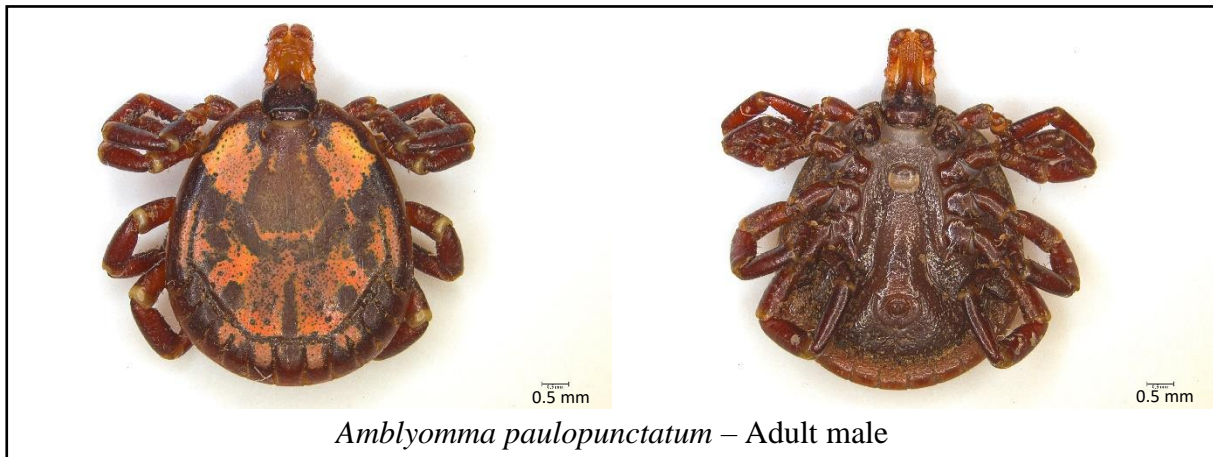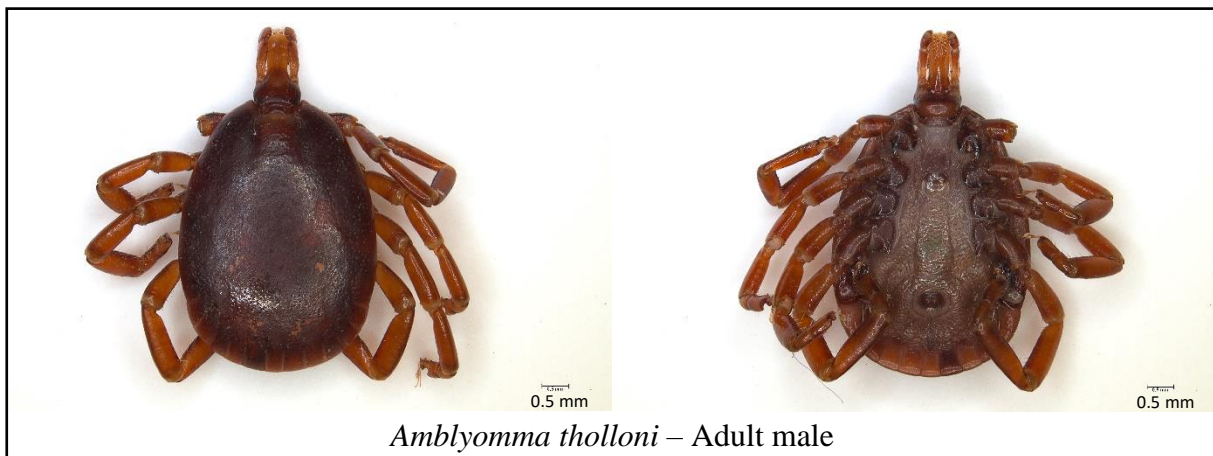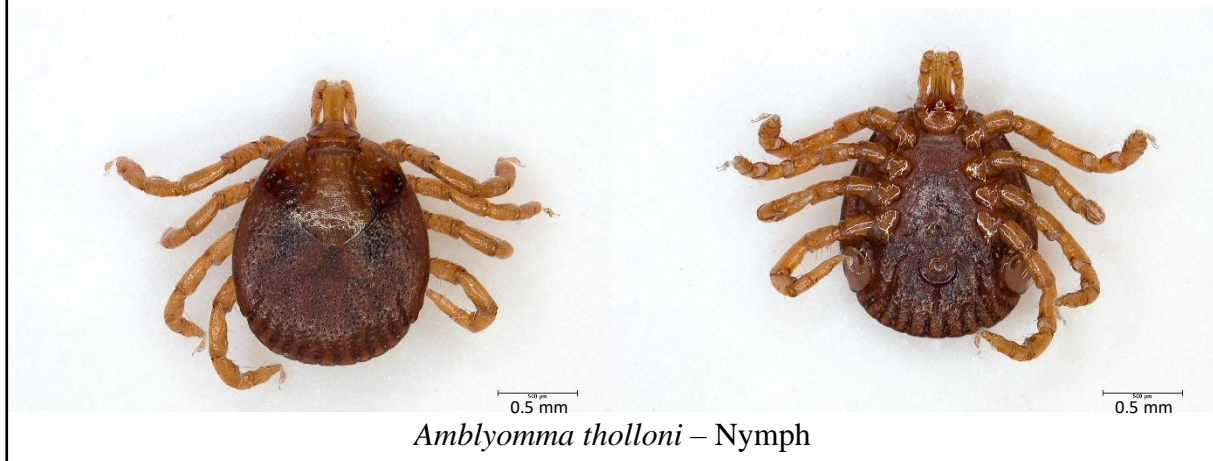

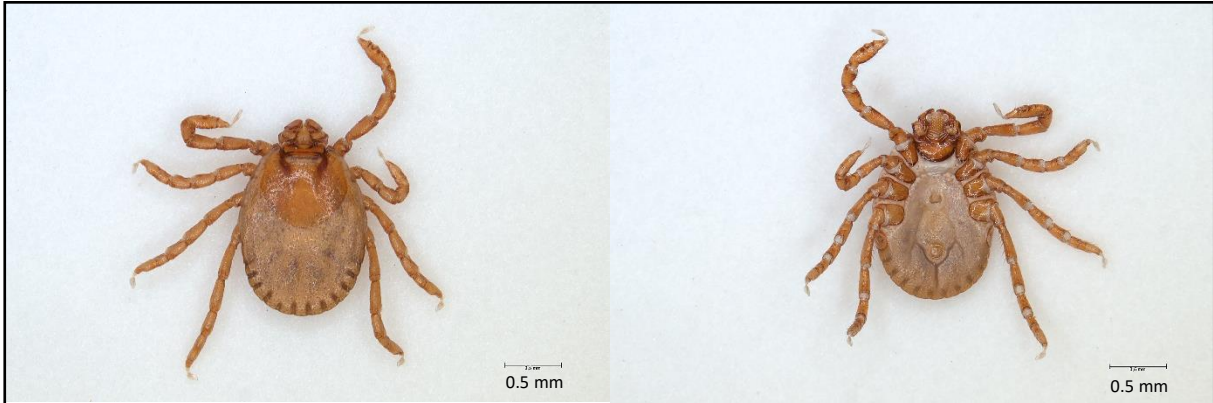

*Haemaphysalis parvata* – Adult female

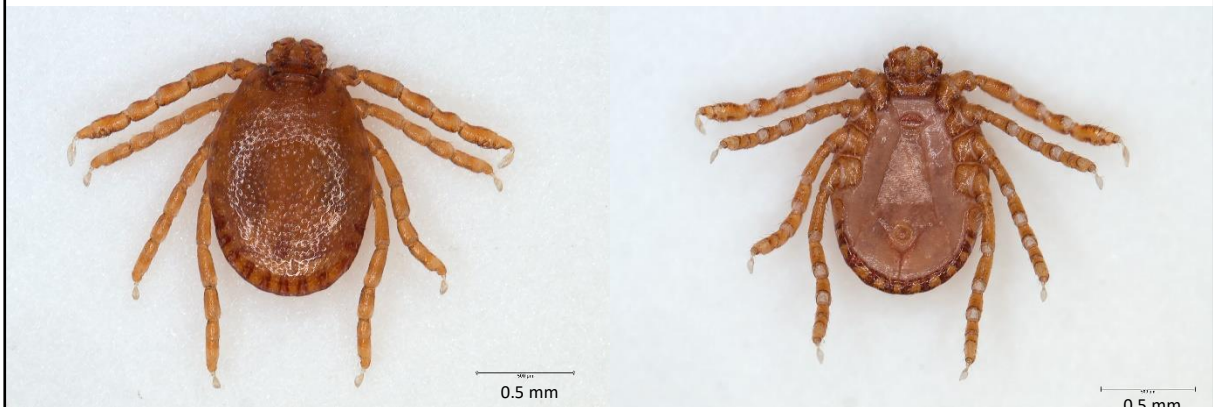

*Haemaphysalis parvata* – Adult male

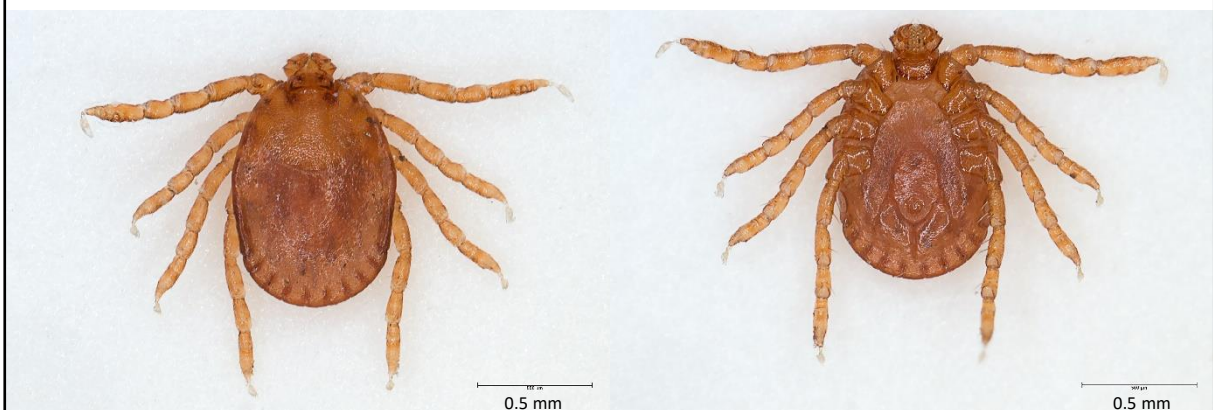

*Haemaphysalis parvata* – Nymph

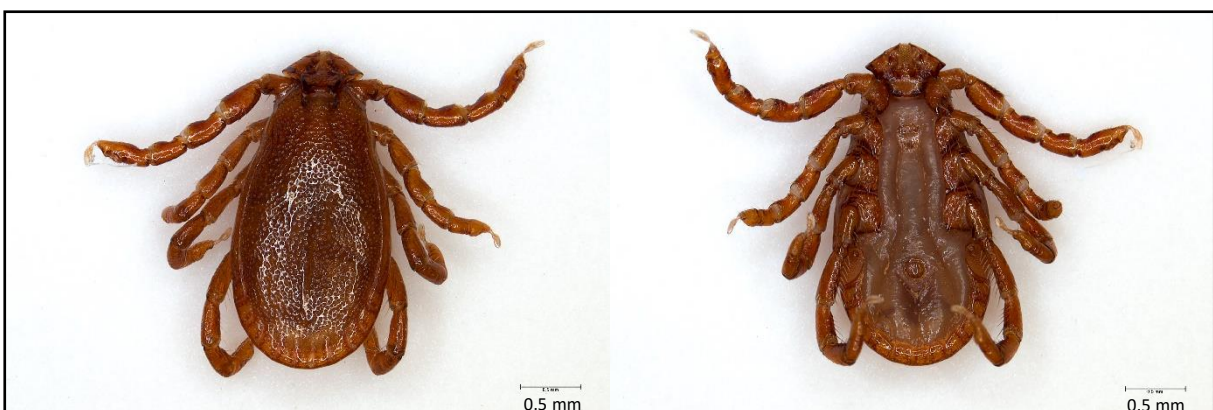

*Haemaphysalis punctaleachi* – Adult female

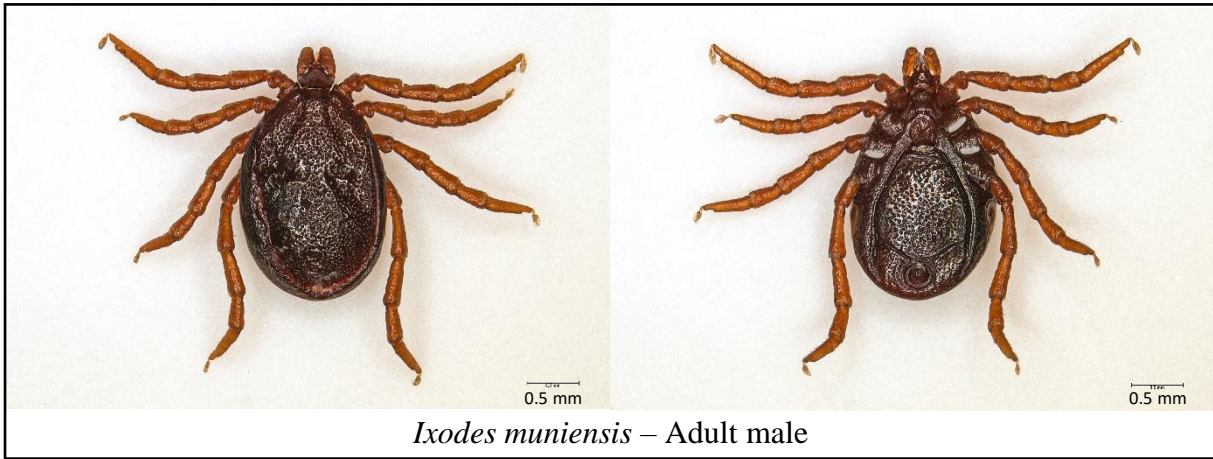

*Ixodes muniensis* – Adult male

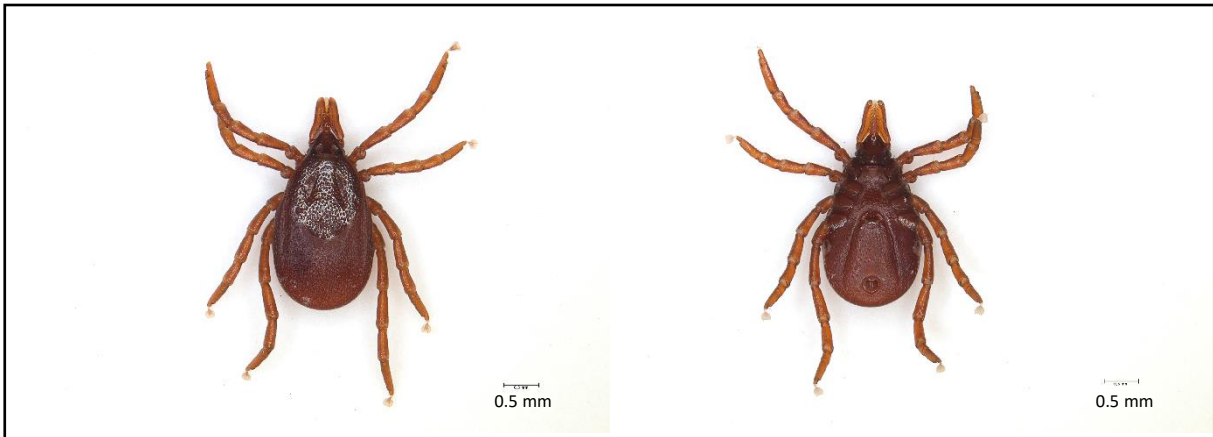

*Ixodes rarus/latus* – Adult female

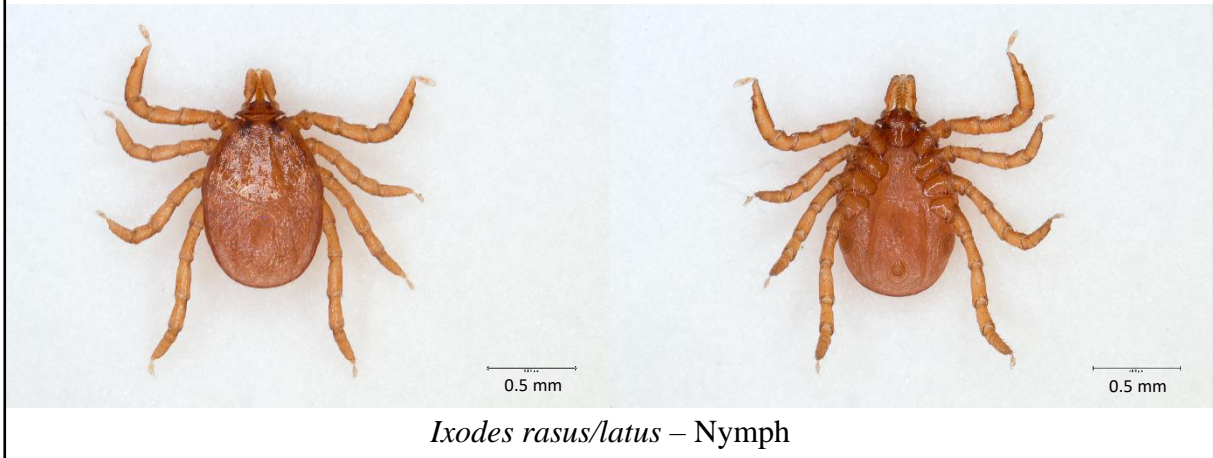

*Ixodes rarus/latus* – Nymph

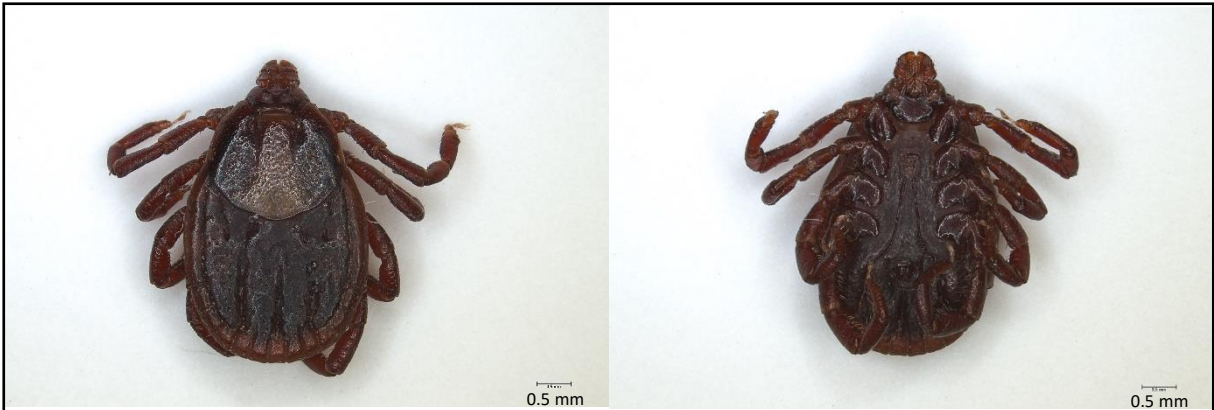

*Rhicephalus dux* – Adult female

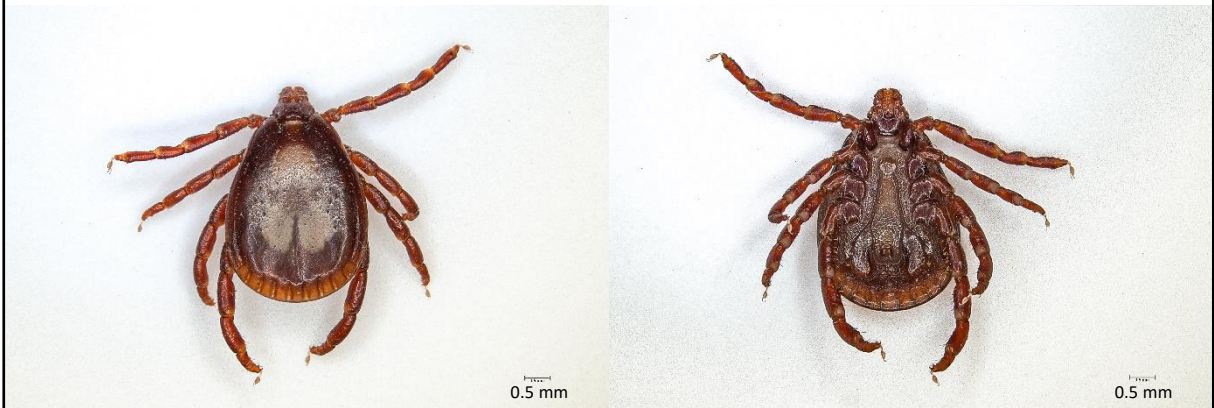

*Rhicephalus dux* – Adult male
